# Supplementary material
Source: Springer Nature journal article supplement (https://www.springermedizin.de/resource/supplementary/13058_2012_3596_MOESM12_ESM.pdf/9703912)

**A (i)**

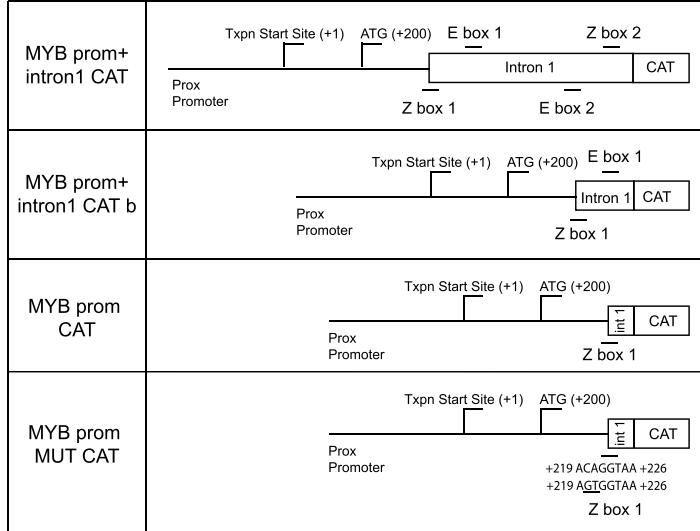

**(ii)**

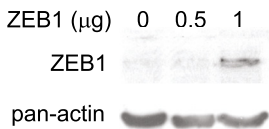

**(iii)**

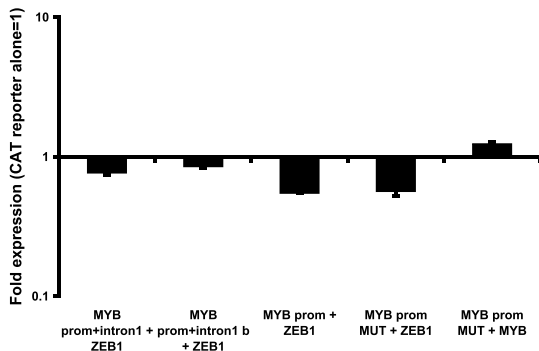

**B**

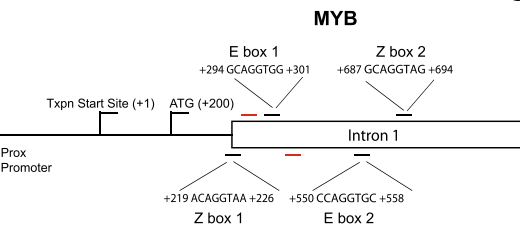

**C**

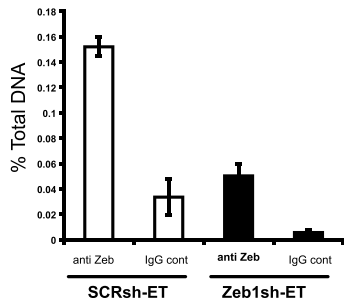

Supplement: MOESM12 [file 9703912]
